# Supplementary material for: Association of IFIH1 and pro-inflammatory mediators: Potential new clues in SLE-associated pathogenesis
Source: PLoS One. 2017 Feb 24;12(2):e0171193. doi: 10.1371/journal.pone.0171193 (PMC5325200; doi:10.1371/journal.pone.0171193)
Supplement: S1 Table — R2 values generated from LDmatrix module in the LDlink program referenced from all European populations in 1000 Genomes. (XLSX) [file pone.0171193.s003.xlsx]

## Sheet: Sheet1
S1 Table. R2 measure of LD
rs#	rs1990760a	rs10930046a	rs13023380a	rs79711023b	rs76162067b
rs1990760a	1	0.019	0.619	0.019	0.019
rs10930046a	0.019	1	0.013	0	0
rs13023380a	0.619	0.013	1	0.029	0.013
rs79711023b	0.019	0	0.029	1	0
rs76162067b	0.019	0	0.013	0	1
R2 values generated from LDmatrix module in the LDlink program referenced from all European populations in 1000 Genomes
aPreviously published SNPs
bNovel SNPs from current study
