# Supplementary material for: Association of IFIH1 and pro-inflammatory mediators: Potential new clues in SLE-associated pathogenesis
Source: PLoS One. 2017 Feb 24;12(2):e0171193. doi: 10.1371/journal.pone.0171193 (PMC5325200; doi:10.1371/journal.pone.0171193)
Supplement: S2 Table — Counts and percentages of medication use within each study group. (XLSX) [file pone.0171193.s004.xlsx]

## Sheet: Sheet1
S2 Table. Medication Use in Cases, FDRs, and Controls
Medications: n positive (%)	Cases	FDRs	Ctls	p-valuec
Prednisone	54 (23.7%)	15 (10.4%)	1 (1.2%)	<0.0001
Hydroxychloroquine	83 (36.4%)	13 (9.1%)	0	<0.0001
Immunosuppressantsa	50 (21.9%)	4 (2.8%)	0	<0.0001
Major immunosuppressantsb	13 (5.7%)	1 (0.7%)	0	<0.0001
aImmunosuppressants include methotrexate and azathioprine
bMajor immunosuppressants include mycophenolate mofetil and cyclophosphamide
cSignificance determined by Chi-square analysis
